# Supplementary material for: Genome-scale CRISPR–Cas9 screen reveals novel regulators of B7-H3 in tumor cells
Source: PubMed Central journal article supplement — J Immunother Cancer. 2022 Jun 29;10(6):e004875. doi: 10.1136/jitc-2022-004875 (PMC9244714; doi:10.1136/jitc-2022-004875), 2022-06-29
Supplement: jitc-2022-004875supp001.pdf [file jitc-2022-004875supp001.pdf]

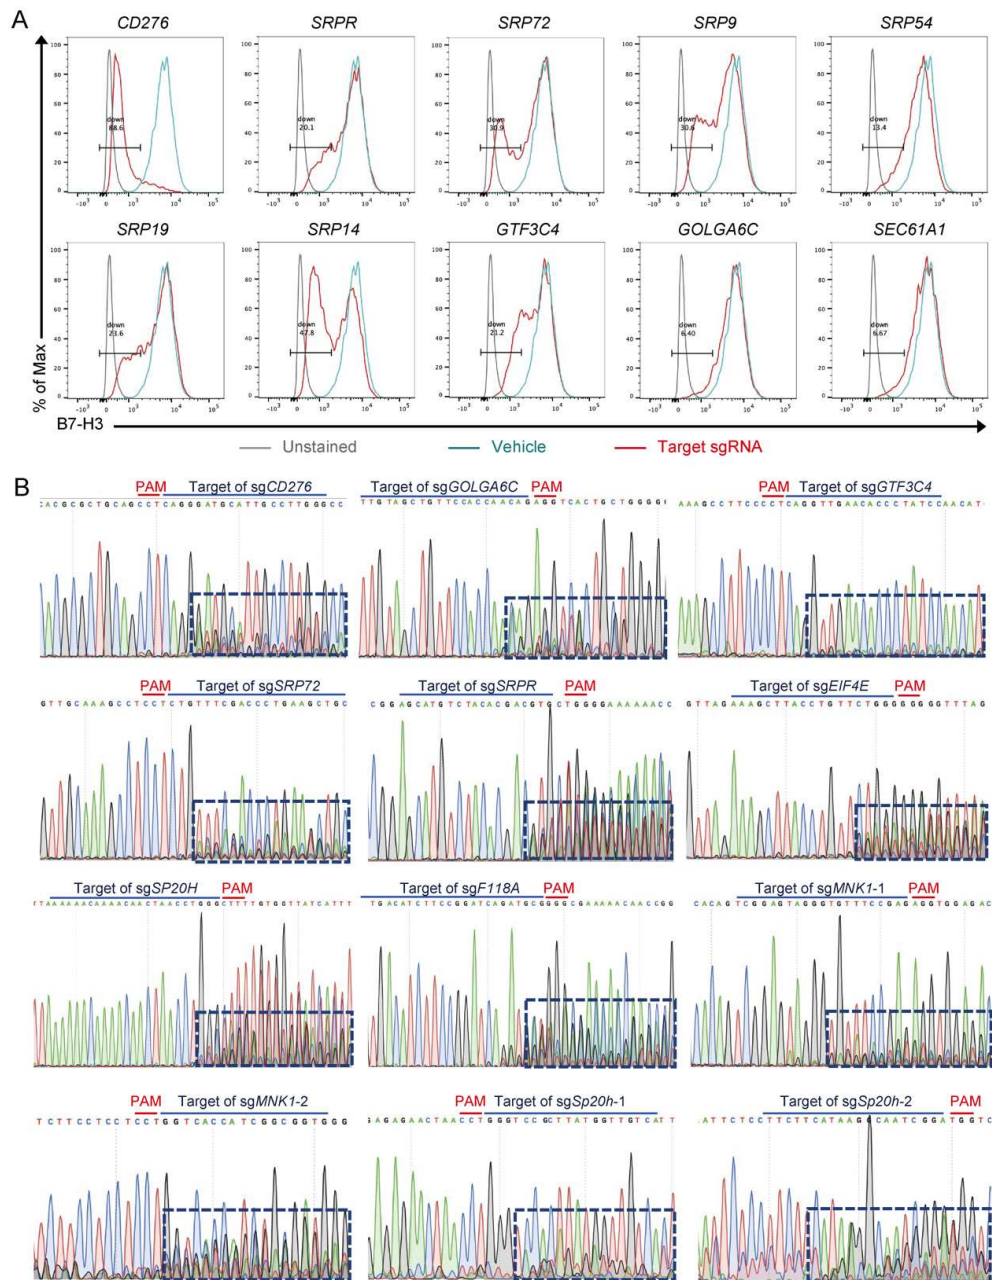

**Figure S1. *In vitro* validation of positive regulators of B7-H3 by CRISPR/Cas9. (A)** Flow cytometry analysis of cell-surface B7-H3 in A375 cells expressing Cas9 and a control sgRNA or sgRNA targeting indicated genes. **(B)** Sanger sequencing of gene knockout SK-OV-3 polyclones after targeting with the indicated sgRNAs.

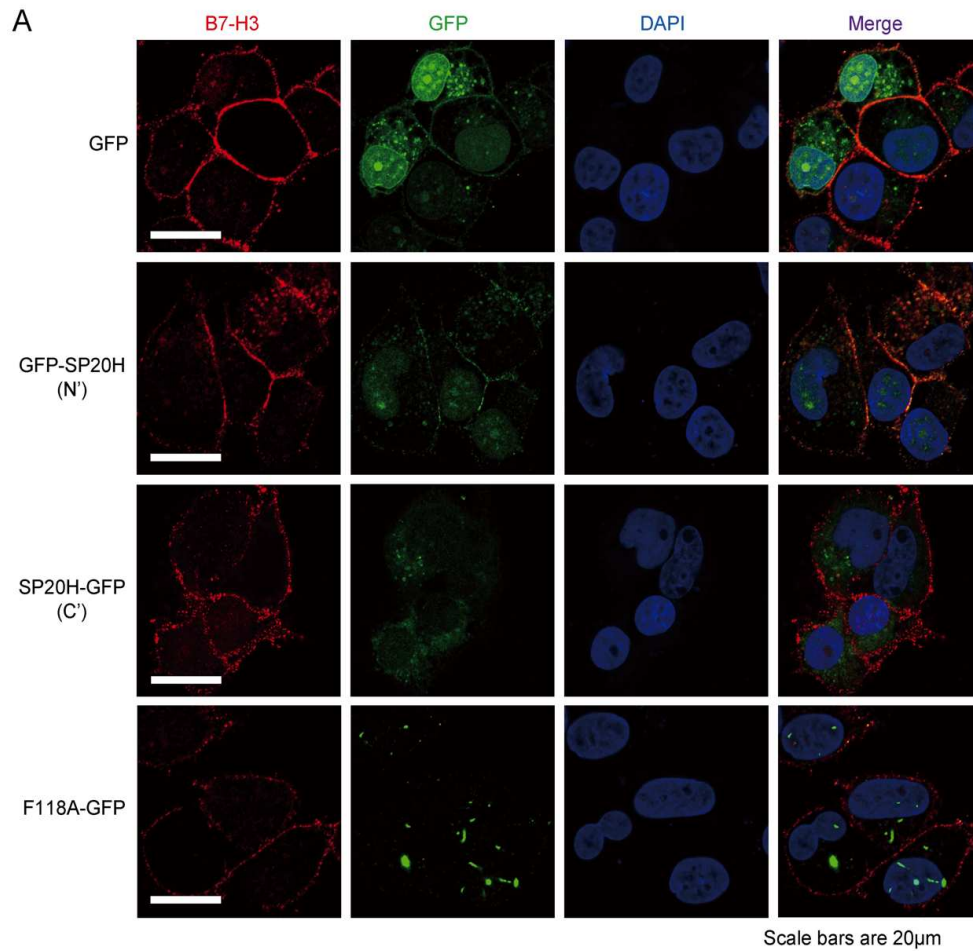

**Figure S2. Cellular localization analysis of SP20H and F118A.** (A) Co-localization of B7-H3 and SP20H, F118A in HeLa cells were visualized by confocal immunofluorescent imaging. Red: Alexa Fluor 594-labeled B7-H3 staining; Green: GFP fusion proteins, N'/C': GFP fused to the N or C terminus of SP20H; Blue: DAPI indicates nuclei.

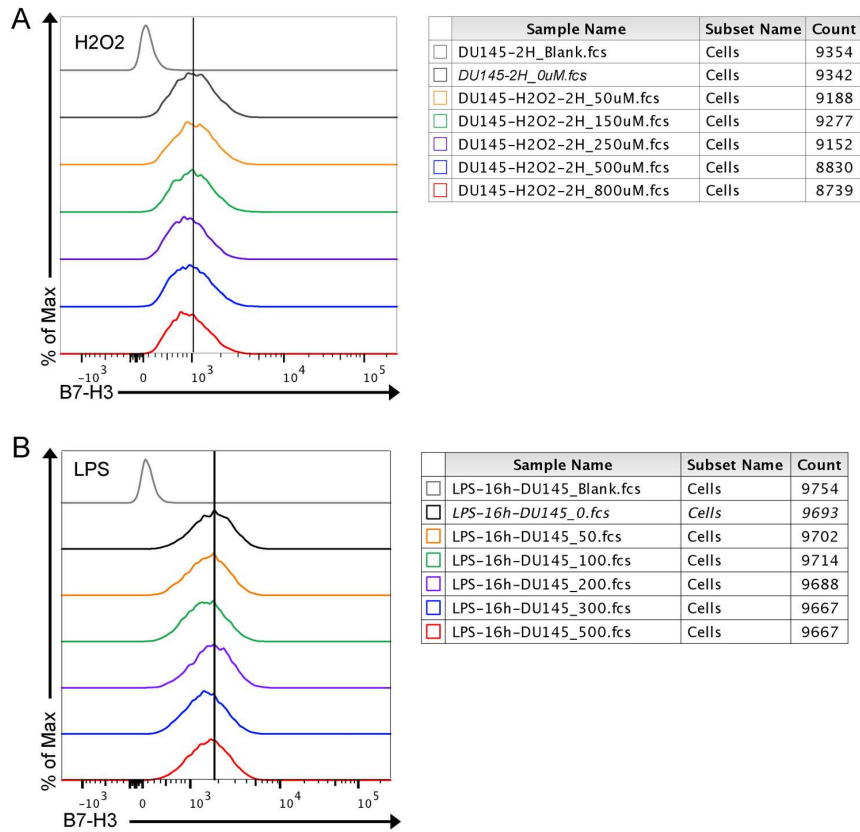

**Figure S3. Treatment with LPS and H<sub>2</sub>O<sub>2</sub> have no significant effect on B7-H3 expression in cancer cells.** (A-B) Histograms show the surface B7-H3 expression on DU145 cells after 16hr-treatment with different concentrations of LPS (0, 25, 50, 100, 125, 175, 200, 250, 300, 400, 500ng/ml), and H<sub>2</sub>O<sub>2</sub> (0, 50, 150, 250, 500, 800 μM).

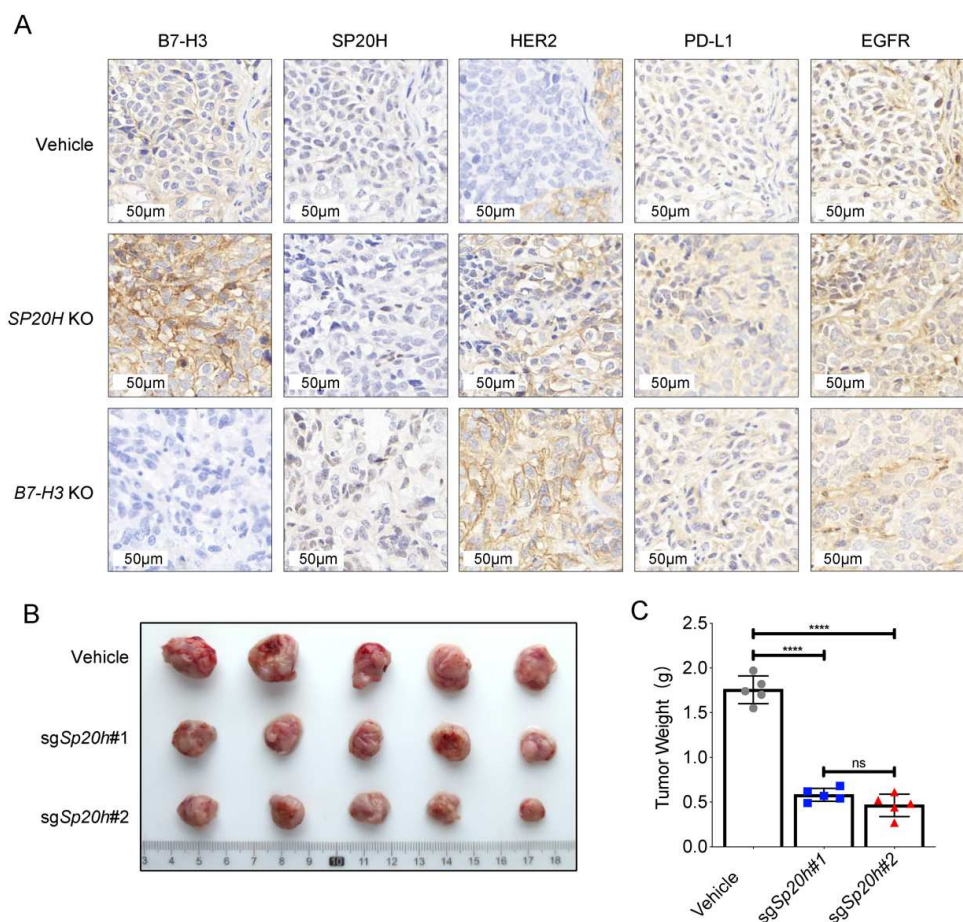

**Figure S4. Effect of SP20H depletion on tumor surface marker expression and tumor growth.** (A) Representation immunohistochemical stains of indicated markers on tumors generated after subcutaneous injection of control, *CD276*<sup>-</sup>, or *SP20H*-knockout SK-OV-3 cells in NOD-SCID mice (n=5). Brown: indicated antigens; Blue: Mayer hematoxylin nuclear counterstain. Scar bars are 50 $\mu$ m. (B) Pictures of tumors derived from control and *Sp20h*-KO 4T1 cells. (C) Weight of the harvested 4T1 tumors after 25 days growth (n=5; two-tailed Student's t-test; \*\*\*\*P <0.0001; ns, no significant).

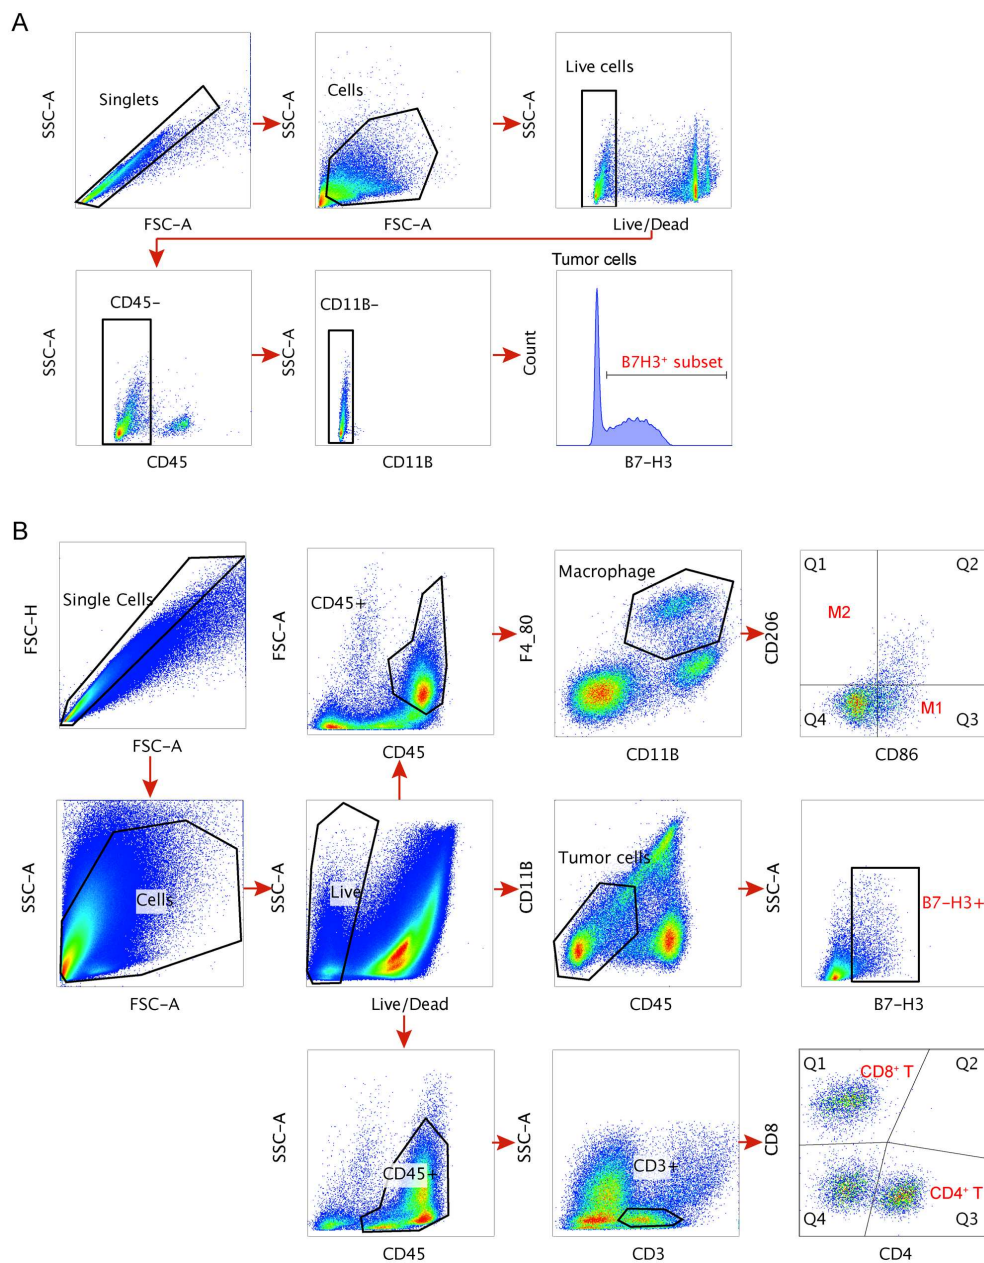

**Figure S5. Representative gating strategies for flowcytometry analysis. (A)** Gating strategy for figure 5D. **(B)** Gating strategy for figure 5F.

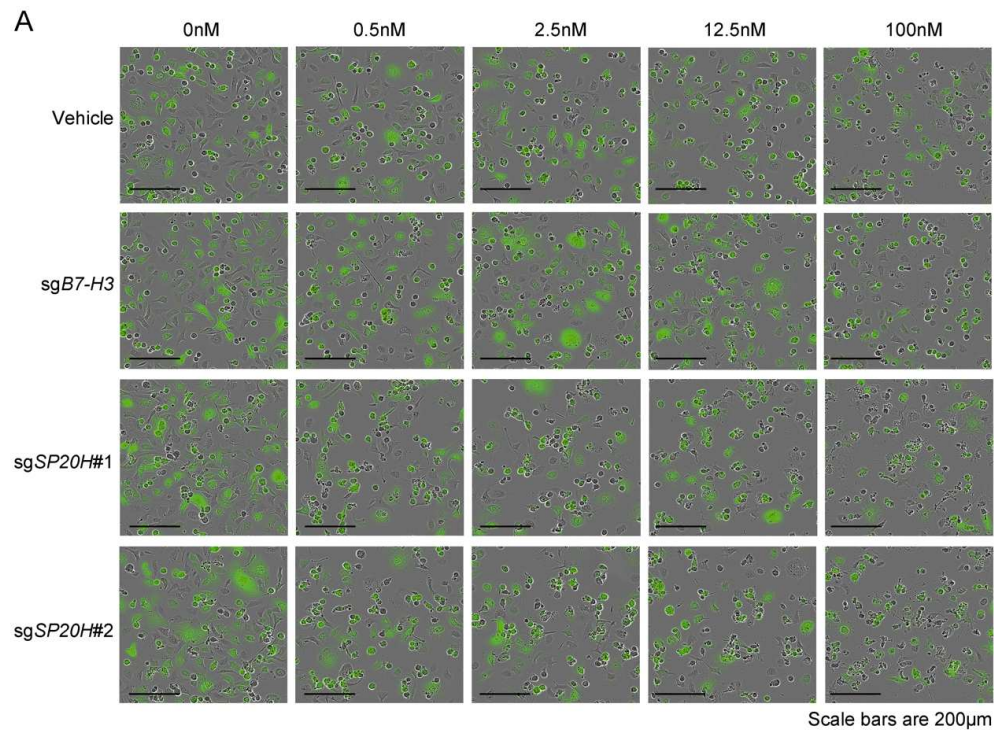

**Figure S6. *In vitro* killing assay of  $\alpha$ B7-H3-DM1 against SK-OV-3 cells with different expression of B7-H3. (A)** Representation images of different concentration of  $\alpha$ B7-H3-DM1 treated or untreated SK-OV-3-GFP cells from each group were shown.

**Table S1. Sequence information of primers and sgRNAs**

| <b>sgRNA</b> | <b>20nt targeting sequences</b>                                                  |
|--------------|----------------------------------------------------------------------------------|
| sgCD276      | CACAGGGCAACGCATCCCTG                                                             |
| sgSP20H-1    | TGATAACCACAAATGGACCC                                                             |
| sgSP20H-2    | GGATATTCTCTGATGCTCAG                                                             |
| sgF118A      | CATCTTCCGGATCAGATCAT                                                             |
| sgEIF4E-1    | AAACTTGGCAAGCAAACCTG                                                             |
| sgEIF4E-2    | AAACTTGGCAAGCAAACCTG                                                             |
| sgMNK1-1     | TCGAGTAGGGTGTTCGAG                                                               |
| sgMNK1-2     | CCATCGCAGATGGTGACAGG                                                             |
| sgSRP72      | GCAGCTTCAGGGTCGAACAG                                                             |
| sgSRP9       | GATGCCGCAGTACCAGACCT                                                             |
| sgSRPR       | AGCATGTCTACACGACGCTG                                                             |
| sgSRP14      | TATAGACGCTGCCCGACGTC                                                             |
| sgGTF3C4     | GGATAGGGTGTTCACCCTG                                                              |
| sgSRP19      | CCAATACAGAGGCAGAGTCC                                                             |
| sgGOLGA6C    | TTGTAGCTGTTCCACCACAG                                                             |
| sgSp20h-1    | TGACAACCATAAGTGGACCC                                                             |
| sgSp20h-2    | TTCTTCATAAGGCAATCGGA                                                             |
| <b>shRNA</b> | <b>Sequences</b>                                                                 |
| shSP20H-F1   | aattGCTTGTTATGCAAGAGACTCTCGAGAGTCTCTTGC<br>ATAACAAGCTTTTTTat                     |
| shSP20H-R1   | AAAAAAAGCTTGTTATGCAAGAGACTCTCGAGAGTC<br>TCTTGCATAACAAGC                          |
| shSP20H-F2   | aattGCAACAAGCTTTAGAACTACTCGAGTAGTTCTAAA<br>GCTTGTTGCTTTTTTat                     |
| shSP20H-R2   | AAAAAAAGCAACAAGCTTTAGAACTACTCGAGTAG<br>TTCTAAAGCTTGTTGC                          |
| shCD276-F1   | aattTTCAGCCTGGCACAGCTCAACCTCATCTGCTCGAG<br>CAGATGAGGTTGAGCTGTGCCAGGCTGAATTTTTTat |
| shCD276-R1   | AAAAAAATTCAGCCTGGCACAGCTCAACCTCATCTGC<br>TCGAGCAGATGAGGTTGAGCTGTGCCAGGCTGAA      |
| shCD276-F2   | aattTCGTGTGCTGGAGAAAGATCAAACAGAGCCTCGA<br>GGCTCTGTTTGATCTTTCTCCAGCACACGATTTTTTat |
| shCD276-R2   | AAAAAATCGTGTGCTGGAGAAAGATCAAACAGAGC<br>CTCGAGGCTCTGTTTGATCTTTCTCCAGCACACGA       |

|                   |                                                               |
|-------------------|---------------------------------------------------------------|
| shEIF4E-F         | aattCATATCCAGTTGTCTAGTACTCGAGTACTAGACAACTGGATATGTTTTTTTat     |
| shEIF4E-R         | AAAAAAACATATCCAGTTGTCTAGTACTCGAGTACTAGCAACTGGATATG            |
| Sramble shRNA-F   | aattCCTAAGGTTAAGTCGCCCTCGCTCGAGCGAGGGCGACTTAACCTTAGGTTTTTTTat |
| Sramble shRNA-R   | AAAAAAACCTAAGGTTAAGTCGCCCTCGCTCGAGCGAGGGCGACTTAACCTTAGG       |
| <b>Genome PCR</b> | <b>Sequences (5'-3')</b>                                      |
| CD276-F           | CTGAGCCTGGCTTCAGCCTG                                          |
| CD276-R           | CAGAACACCTCAGCCTCAG                                           |
| SP20H-F1          | GTTGATCTCCTAGAAAAATCTCAGG                                     |
| SP20H-R1          | GCTTGTTATAGAGCAGTCTG                                          |
| SP20H-F2          | GAGAAGCTTGTTATGCAAGAGAC                                       |
| SP20H-R2          | TGCTATAGAAGGATCAAGACAGAG                                      |
| F118A-F           | CTCGTGGAGAAGCTGCATCG                                          |
| F118A-R           | AGGACCTTGGTCTTGTCCTTC                                         |
| EIF4E-F1          | TTCATTCATCTGTTGATGG                                           |
| EIF4E-R1          | AACTAATAAAGCATAATCACC                                         |
| EIF4E-F2          | ATATTGCTGTCATAGATGTG                                          |
| EIF4E-R2          | TGAACTCAAGACTCACAC                                            |
| MNK1-F1           | TGCTGCTTTGCCAACAGAG                                           |
| MNK1-R1           | TGTGGGGACAGGAGTGAG                                            |
| MNK1-F2           | ACCATCAGTGTAACCTCC                                            |
| MNK1-R2           | CATCTGGCTCTAACTTGAC                                           |
| GTF3C4-F          | TGCCATCTCCTTGAGTAAATGC                                        |
| GTF3C4-R          | TGCAGTCTGTTGAGATTTGCC                                         |
| SRP72-F           | TGAATGTTTGGGTCATTTGG                                          |
| SRP72-R           | CTATGGAAAGCACAAATACTCC                                        |
| SRP9-F            | GCGTCGGTTGGCGACTC                                             |
| SRP9-R            | GCAGGGTCCATTTGTGTTTCATTC                                      |
| SRPR-F            | GGCATTTTTGAGAGCATTCC                                          |
| SRPR-R            | CTGACCTTGGCAAGATTAGTAG                                        |
| SRP14-F           | CGTACTCGAGACCTGTGC                                            |
| SRP14-R           | GAATGTGCTCAGTACAGG                                            |
| SRP19-F           | ACGTGGTTCTTCACTATTTTCC                                        |
| SRP19-R           | CTCTCCATGAGCAGTAGTCC                                          |



|                            |                         |
|----------------------------|-------------------------|
| <i>GOLGA6C</i> -F          | CTGTGCATCAAGAGGAGG      |
| <i>GOLGA6C</i> -R          | CTCCTGCTCCTGGAGTC       |
| <b>QPCR</b>                | <b>Primer sequences</b> |
| qh <i>CD276</i> -F         | CCTGAGTCCCAGAGTCCG      |
| qh <i>CD276</i> -R         | CAGGGCTCCTGTGAGG        |
| qh <i>SP20H</i> -F1        | GACTTGTATATTGAAG        |
| qh <i>SP20H</i> -R1        | TGGTCTCGGAATCTGATCC     |
| qh <i>SP20H</i> -F2        | AGCGTACATAAGTTATCTC     |
| qh <i>SP20H</i> -R2        | ACAGATTTTCTTCCACTTG     |
| qh $\beta$ <i>actin</i> -F | CCTTCCTGGGCATGGAGTC     |
| qh $\beta$ <i>actin</i> -R | TGATCTTCATTGTGCTGGGTG   |
